# Supplementary material for: Aligned carbon nanotube/polymer hybrid electrolytes for high performance dye sensitized solar cell applications
Source: Royal Society of Chemistry journal article supplement (doi:10.1039/c5ra10843h), 2015-01-01
Supplement: c5ra10843h1.pdf [file c5ra10843h1.pdf]

## Supplementary Information

### **Aligned Carbon Nanotube/Polymer Hybrid Electrolytes for High Performance Dye Sensitized Solar Cell Applications**

**K. Prabakaran, Akshaya K. Palai, Smita Mohanty\* and Sanjay Kumar Nayak**

Laboratory for Advanced Research in Polymeric Materials, Central Institute of Plastics  
Engineering & Technology, Bhubaneswar, Odisha, India-751 024.

\* Corresponding author

Email: [papers.journal@gmail.com](mailto:papers.journal@gmail.com)

Phone No: 0674 2742852

Fax No: 0674 2740463

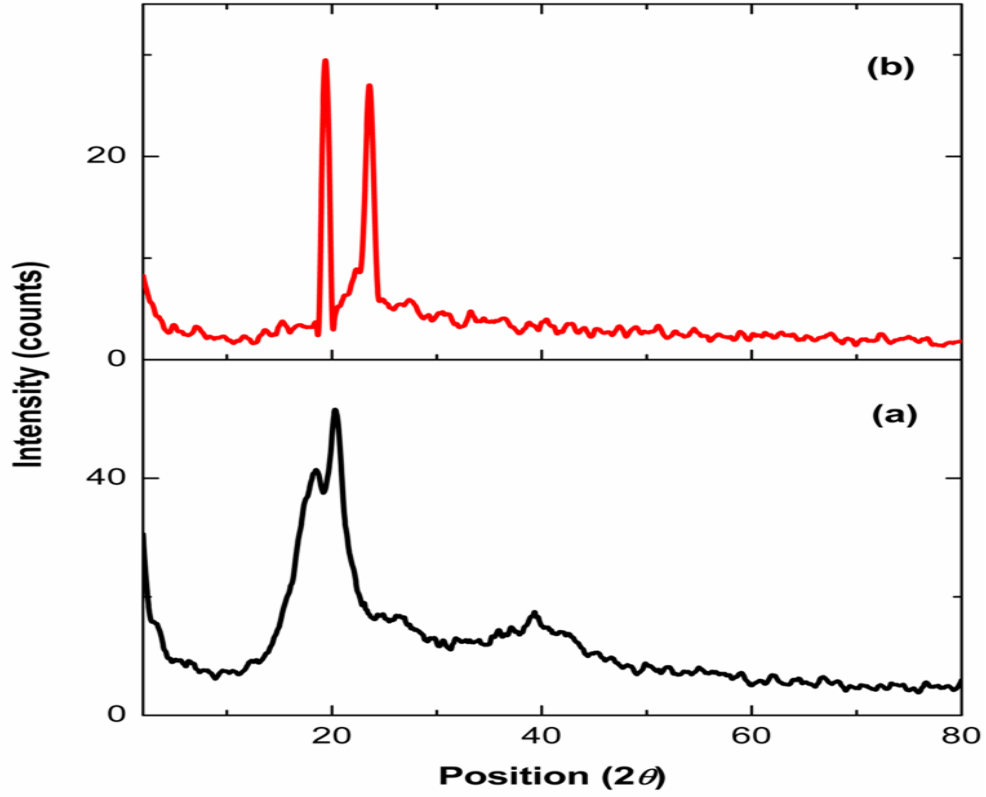

Fig. S1<sup>†</sup> WAXD patterns of (a) PVDF-HFP and (b) PEO

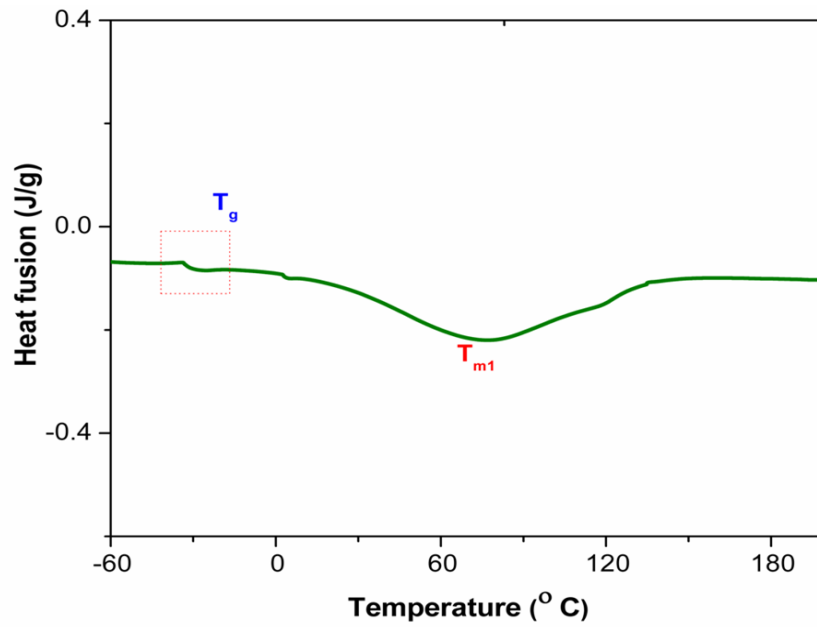

Fig.S2<sup>†</sup> DSC curve of aMWCNT-PEO/ PVDF-HFP/electrolyte membrane

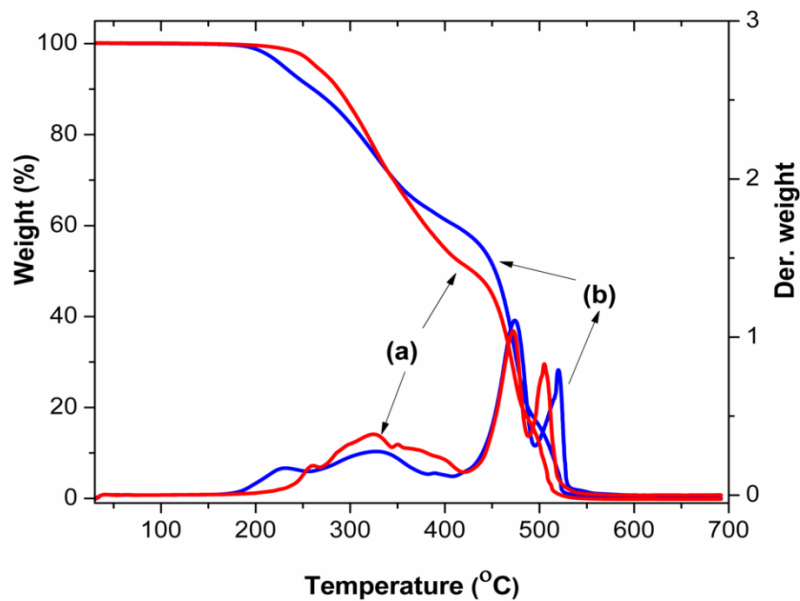

**Fig. S3<sup>†</sup>** TGA and DTA curves of (a) PEO/PVDF-HFP and (b) PEO/PVDF-HFP-MWCNT nanocomposite membrane

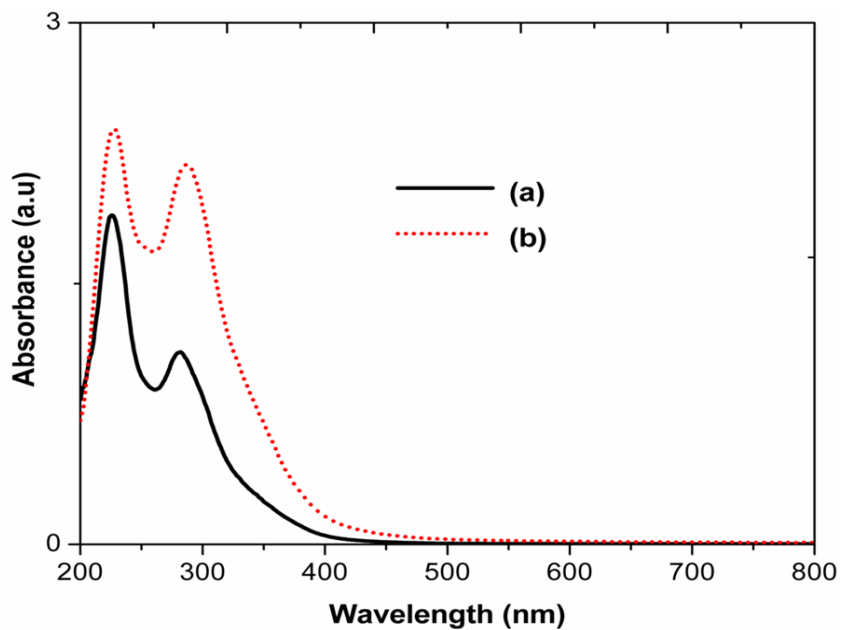

**Fig. S4<sup>†</sup>** UV-Visible spectra of (a) PEO/PVDF-HFP and (b) PEO/PVDF-HFP-MWCNT nanocomposite electrolyte

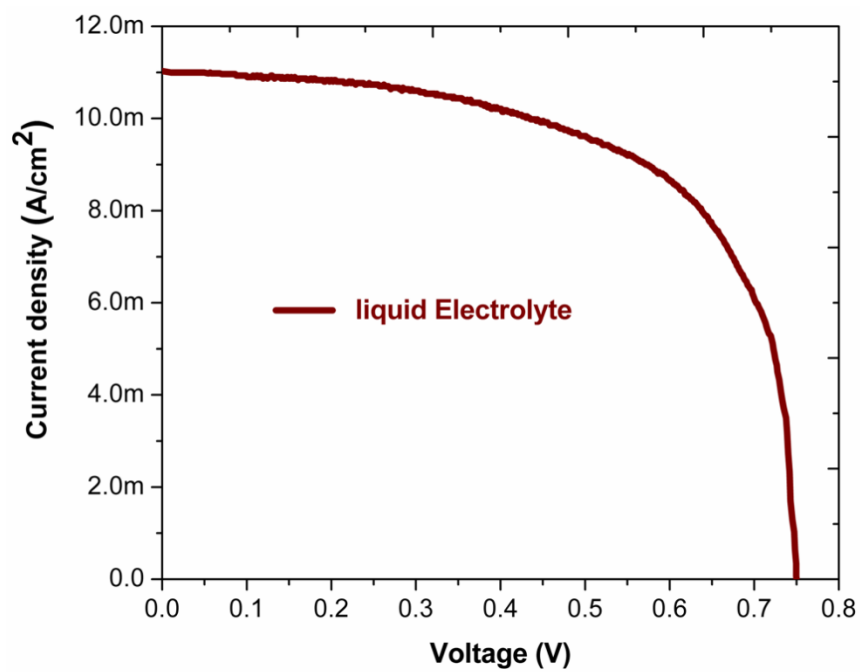

Fig. S5<sup>†</sup> J-V characteristics curves of liquid electrolyte

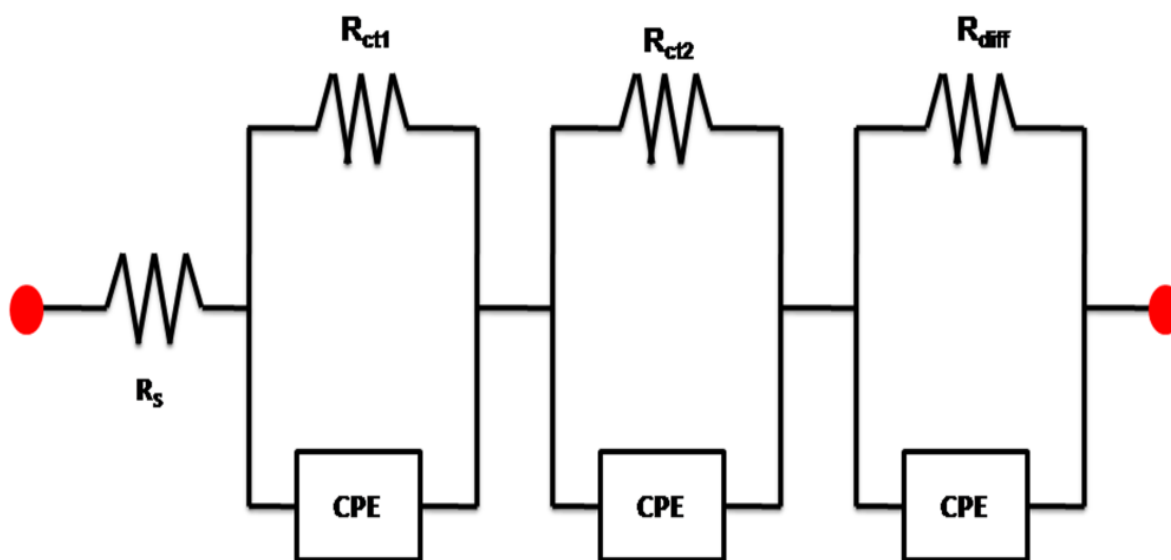

Fig. S6<sup>†</sup> Equivalent circuit for EIS spectra of DSSC
